# Supplementary material
Source: PubMed Central journal article supplement (PMC3059000)

## Supplementary Information

### Supplementary Methods

*GdnHCl denaturation performed by reversed titration-* Briefly, the titration was performed by titrating A $\beta$  solution in Buffer A containing <0.1 M GdnHCl into an unfolded A $\beta$  solution in Buffer A containing 1.5 or 2 M GdnHCl. The desired metal ion concentration, 25  $\mu$ M of A $\beta$ , and 5  $\mu$ M of Bis-ANS were present in both solutions. The duration for each titration was approximately 30 s and each set of denaturation experiment was less than 1 h. The Bis-ANS fluorescence emission at 490 nm was collected, averaged, and normalized. The normalized emission intensity versus GdnHCl concentration was plotted.

*GdnHCl denaturation monitored by tyrosine emission-* The equilibrium unfolding was performed as described in “Experimental Procedures” except the samples were in the absence of Bis-ANS and the intrinsic tyrosine fluorescence were monitored. The samples were excited at 270 nm and emission intensities at 300 nm were collected. The signals were plotted against GdnHCl concentration.

### Supplementary Figure Legends

**Supplementary Fig. 1.** Normalized Bis-ANS spectra of A $\beta$  in the absence and presence of the metal ions. A $\beta$  in the absence (●) and presence of 200  $\mu$ M Zn<sup>2+</sup> (▽), 200  $\mu$ M Cu<sup>2+</sup> (△), 200  $\mu$ M Fe<sup>3+</sup> (○), and 500  $\mu$ M Al<sup>3+</sup> (□) are shown. The data were normalized to Bis-ANS fluorescence intensity at 500 nm of A $\beta$  without the metal ions. Panel (A) and (B) show the spectra of all conditions in two ranges of wavelength: 450-550 and 465-515 nm. Panel (C) and (D) show the spectra of A $\beta$  alone and A $\beta$  with Cu<sup>2+</sup> (△) or Fe<sup>3+</sup> in two ranges of wavelength: 450-550 and 465-515 nm.

**Supplementary Fig. 2.** Tyrosine fluorescence spectra of A $\beta$  in various concentrations of (A) Zn<sup>2+</sup>, (B) Cu<sup>2+</sup>, (C) Fe<sup>3+</sup>, and (D) Al<sup>3+</sup>. The concentrations of the metal ions are colored as indicated.

**Supplementary Fig. 3.** Binding kinetics of Zn<sup>2+</sup>, Cu<sup>2+</sup>, Fe<sup>3+</sup>, and Al<sup>3+</sup> with A $\beta$ . Intrinsic tyrosine fluorescence of A $\beta$  in the absence (●) and presence of Zn<sup>2+</sup> (▽), Cu<sup>2+</sup> (△), Fe<sup>3+</sup> (○), Al<sup>3+</sup> (□) were monitored with excitation at 270 nm. Exponential fits for Zn<sup>2+</sup>, Fe<sup>3+</sup>, and Al<sup>3+</sup> are shown in solid lines and the residuals are shown above.

**Supplementary Fig. 4.** Bis-ANS fluorescence, tyrosine fluorescence, and far-UV CD spectra of A $\beta$  in native (<0.12 M GdnHCl) and denatured (3 M GdnHCl) condition. (A) Bis-ANS fluorescence, (B) tyrosine fluorescence, and (C) far-UV CD spectra of “native” and unfolded A $\beta$  are shown in solid and dashed lines, respectively.

**Supplementary Fig. 5.** GdnHCl denaturation of A $\beta$  in the absence and presence of the metal ions. (A) GdnHCl denaturation of A $\beta$  monitored by Bis-ANS fluorescence. Data obtained from forward titration are shown as follows: A $\beta$  in the absence ( $\diamond$ ) and the presence of 25  $\mu$ M Zn $^{2+}$  ( $\nabla$ ), 25  $\mu$ M Cu $^{2+}$  ( $\triangle$ ), 50  $\mu$ M Fe $^{3+}$  ( $\circ$ ), and 100  $\mu$ M Al $^{3+}$  ( $\square$ ). Data obtained from reverse titration are colored as follows: A $\beta$  in the absence ( $\blacklozenge$ , black) and the presence of 25  $\mu$ M Zn $^{2+}$  ( $\blacktriangledown$ , green), 25  $\mu$ M Cu $^{2+}$  ( $\blacktriangle$ , blue), 50  $\mu$ M Fe $^{3+}$  ( $\bullet$ , orange), and 100  $\mu$ M Al $^{3+}$  ( $\blacksquare$ , red). (B) GdnHCl denaturation of A $\beta$  monitored by tyrosine fluorescence. A $\beta$  in the absence ( $\bullet$ ) and the presence of 25  $\mu$ M Zn $^{2+}$  ( $\nabla$ ), 25  $\mu$ M Cu $^{2+}$  ( $\triangle$ ), 50  $\mu$ M Fe $^{3+}$  ( $\circ$ ), and 100  $\mu$ M Al $^{3+}$  ( $\square$ ) are shown. The data scattering was primarily due to the small differences resided in tyrosine fluorescence between “native” and unfolded A $\beta$ .

**Supplementary Fig. 6.** Oligomerization and fibrillization of A $\beta$  in the presence of Al $^{3+}$  in neutral pH monitored by ThT, dot blotting, and TEM. The samples were prepared in 10 mM Tris-HCl, pH 7.85, to insure neutral pH in the solution after addition of Al $^{3+}$ . (A) ThT assay. A $\beta$  in the absence and presence of 100, 250, and 500  $\mu$ M of Al $^{3+}$  are shown in black, blue, magenta, and green. (B) The end-point products were subjected to dot blotting probed by A11 and 6E10 antibodies. (C) The end-point products of A $\beta$  in the presence of 250  $\mu$ M Al $^{3+}$  were centrifuged as described in text. The supernatant and pellet were subjected to A11 and 6E10 dot blotting. (D) TEM images of the total protein before centrifugation (scale bar = 200 nm) as well as the supernatant and pellet after centrifugation (scale bar = 100 nm).

**Supplementary Fig. 7.** Far-UV CD of the end-point products of A $\beta$  aggregation with and without the metal ions. A $\beta$  in the absence ( $\bullet$ ) and in the presence of 25  $\mu$ M Zn $^{2+}$  ( $\nabla$ ), 25  $\mu$ M Cu $^{2+}$  ( $\triangle$ ), 50  $\mu$ M Fe $^{3+}$  ( $\circ$ ), and 250  $\mu$ M Al $^{3+}$  ( $\square$ ) are shown.

**Supplementary Table 1.** The pHs of various aluminum concentrations prepared in 10 mM Tris-HCl, pH 7.4 or pH 7.85, at room temperature. The acidic pHs are underlined.

| $[\text{Al}^{3+}]$ ( $\mu\text{M}$ ) | Tris buffer, pH 7.4 | Tris buffer, pH 7.85 |
|--------------------------------------|---------------------|----------------------|
| 0                                    | 7.4                 | 7.85                 |
| 25                                   | 7.37                | 7.82                 |
| 50                                   | 7.32                | 7.79                 |
| 100                                  | 7.26                | 7.74                 |
| 200                                  | 7.08                | 7.68                 |
| 300                                  | <u>6.86</u>         | 7.64                 |
| 400                                  | <u>6.45</u>         | 7.58                 |
| 500                                  | <u>5.25</u>         | 7.5                  |
| 600                                  | <u>4.91</u>         | 7.39                 |
| 700                                  | <u>4.78</u>         | 7.28                 |
| 800                                  | <u>4.70</u>         | 7.14                 |
| 900                                  | <u>4.65</u>         | <u>6.95</u>          |
| 1000                                 | <u>4.59</u>         | <u>6.65</u>          |

**Supplementary Table 2.** Kinetic parameters of A $\beta$  and the metal ion binding in the millisecond time scale.

|                  | $c_1$   | $k_1$ ( $\text{sec}^{-1}$ ) | $c_2$   | $k_2$ ( $\text{sec}^{-1}$ ) |
|------------------|---------|-----------------------------|---------|-----------------------------|
| $\text{Zn}^{2+}$ | -0.127  | 0.125                       |         | N/A                         |
| $\text{Cu}^{2+}$ |         |                             | N/A     |                             |
| $\text{Fe}^{3+}$ | 0.0712  | 3.455                       | 0.1243  | 0.4345                      |
| $\text{Al}^{3+}$ | -0.0267 | 6.067                       | -0.0186 | 0.0915                      |

$c$  and  $k$  are the amplitudes and rate constants for the kinetic phases occurred between 0.005 to 100 sec .

Supplementary Fig. 1

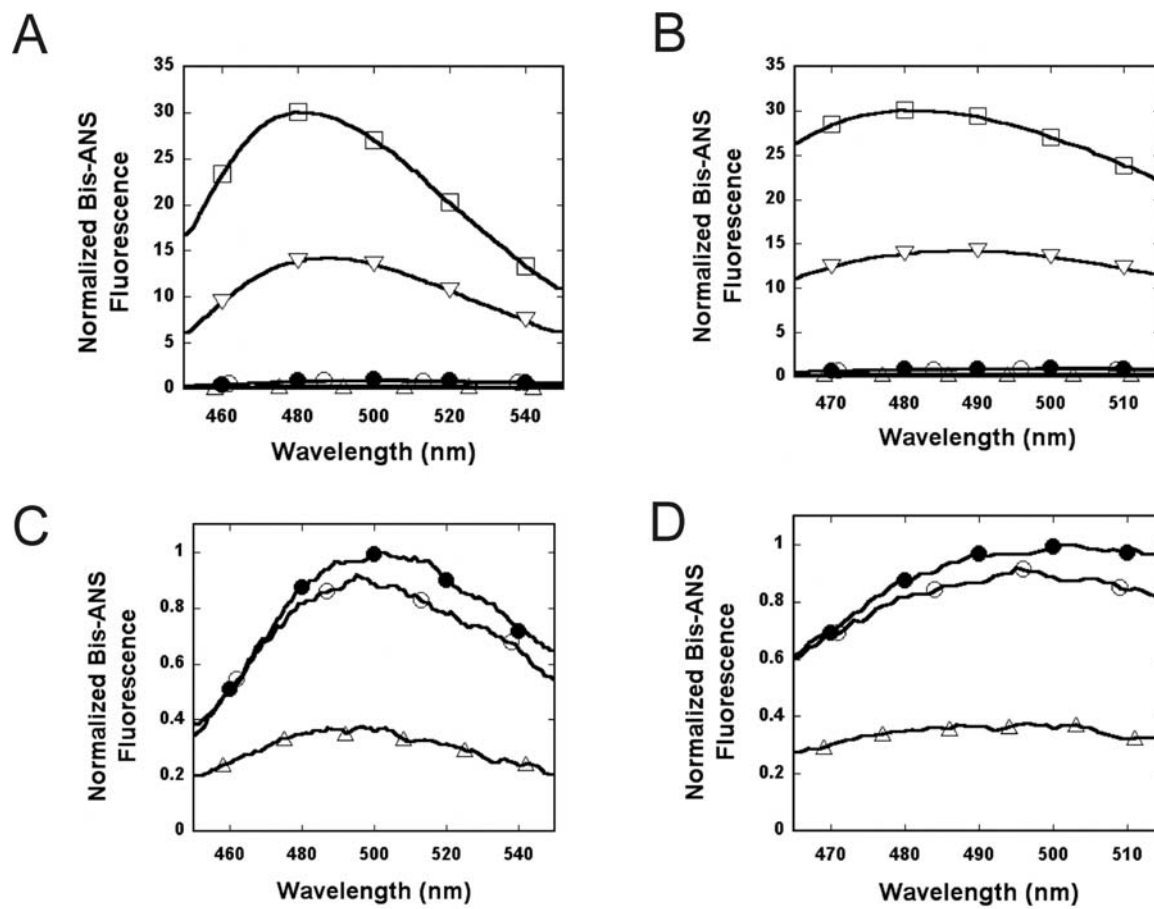

Supplementary Fig. 2

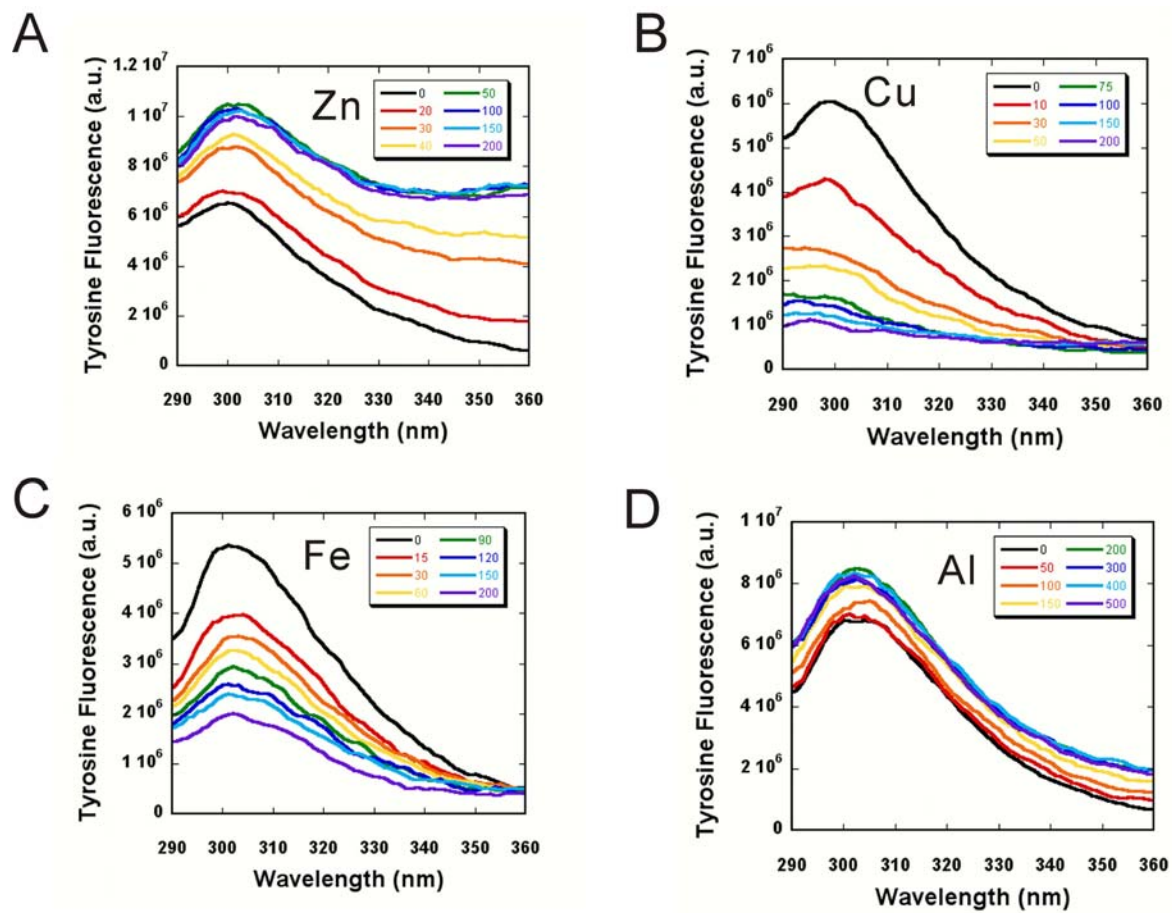

Supplementary Fig. 3

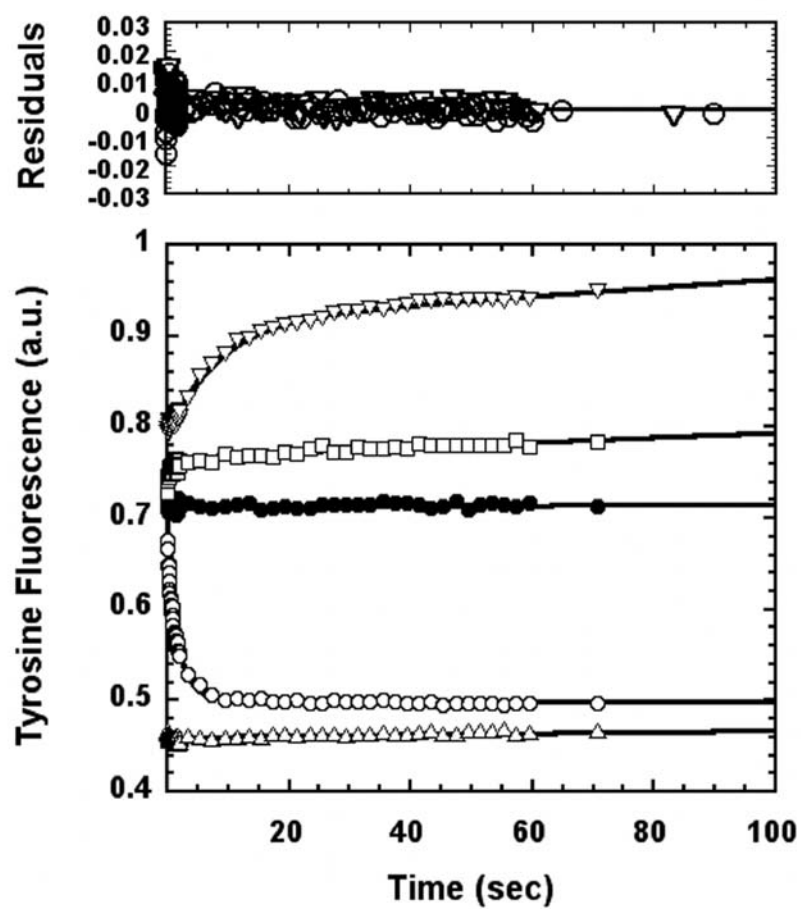

Supplementary Fig. 4

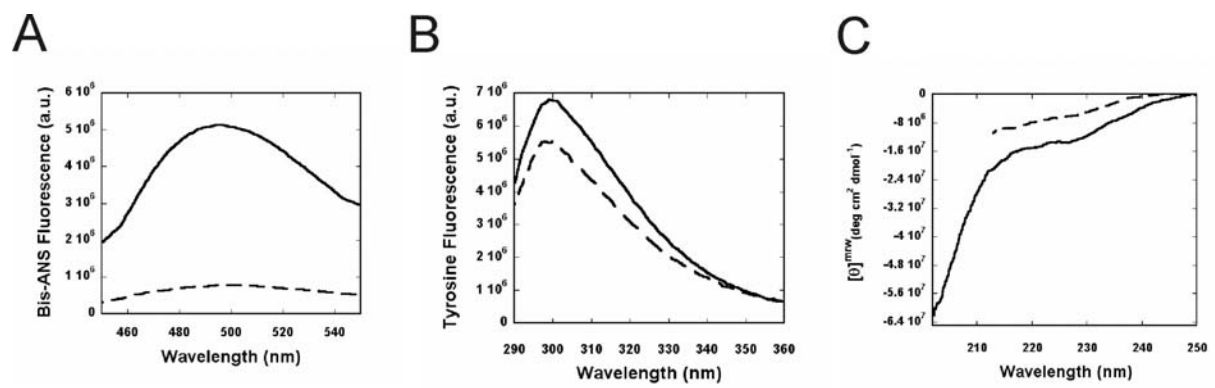

Supplementary Fig. 5

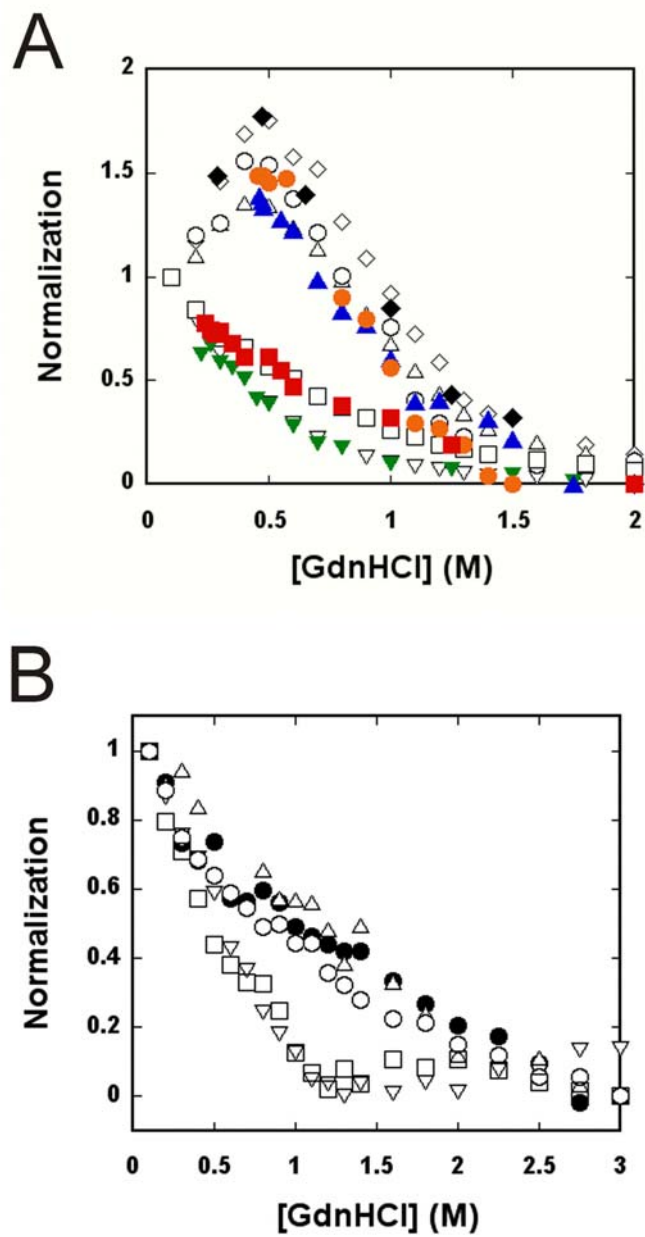

Supplementary Fig. 6

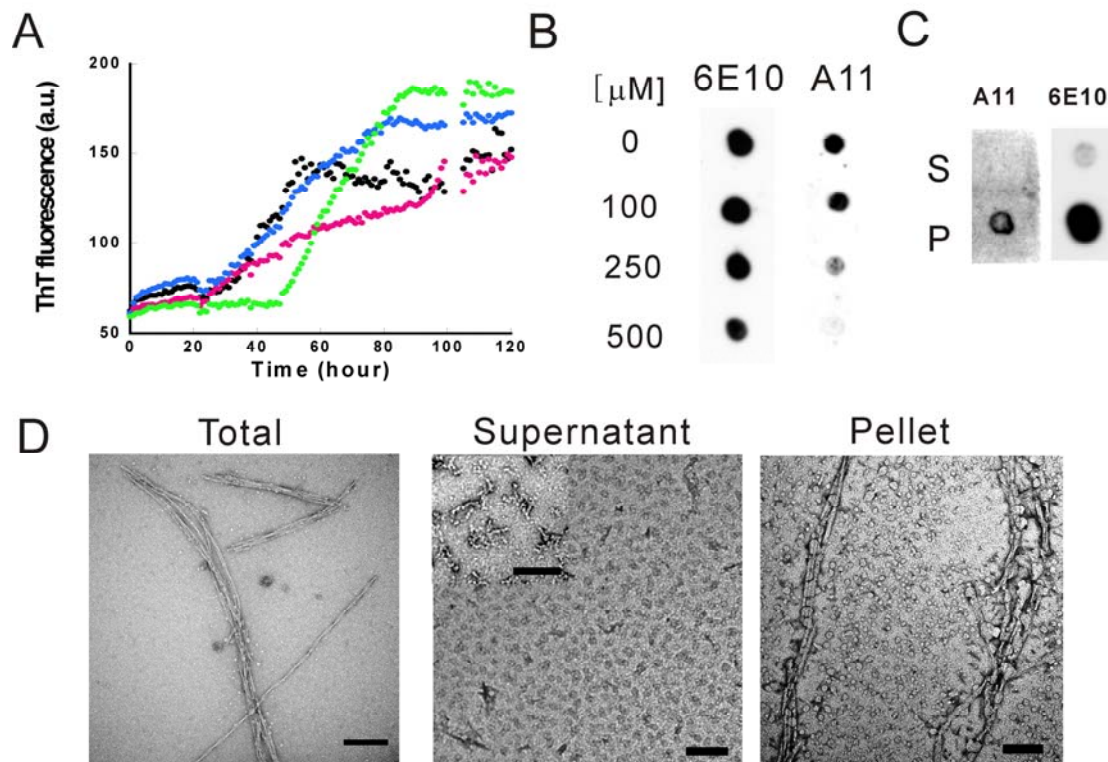

Supplementary Fig. 7

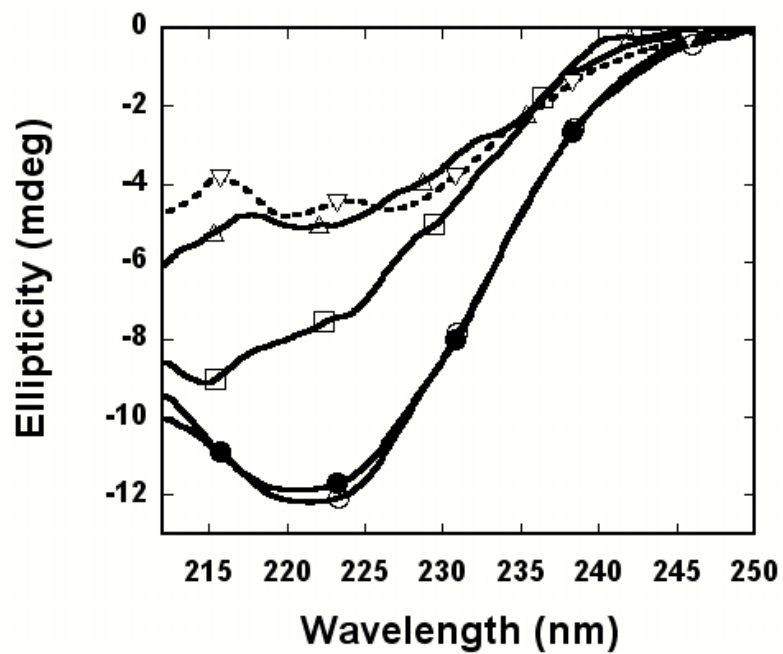

Supplement: supp_M110.177246_jbc.M110.177246-1.pdf [file supp_M110.177246_jbc.M110.177246-1.pdf]
